# Supplementary material for: miR-134 Modulates the Proliferation of Human Cardiomyocyte Progenitor Cells by Targeting Meis2
Source: Int J Mol Sci. 2015 Oct 23;16(10):25199–213. doi: 10.3390/ijms161025199 (PMC4632798; doi:10.3390/ijms161025199)
Supplement: Supplementary file 1 [file ijms-16-25199-s001.pdf]

## Supplementary Information

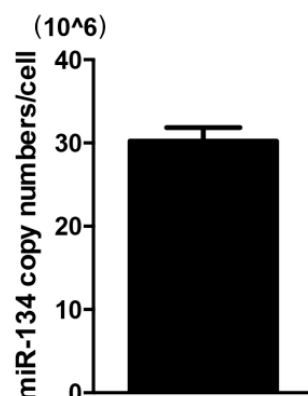

**Figure S1.** The expression level of miR-134 in proliferating hCMPCs. Data were from 3 independent experiments.

a

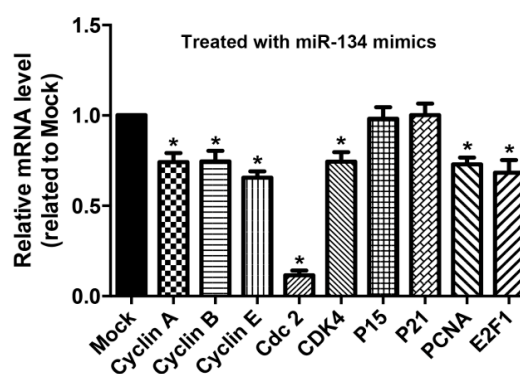

b

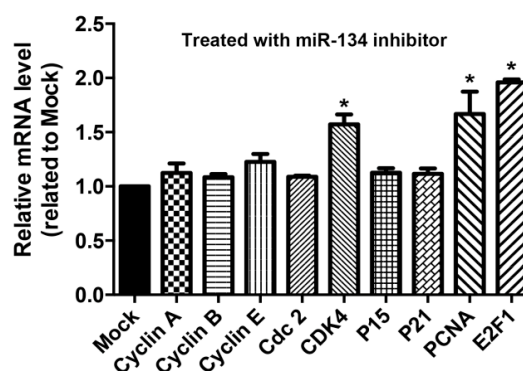

**Figure S2.** Modulation of miR-134 in hCMPCs changes the expression level of cell cycle genes. (a) Relative expression of cell cycle genes in hCMPCs treated with miR-134 mimics; (b) Cell cycle genes were examined in hCMPCs with the inhibition of miR-134. 18s RNA was used as the internal reference. \*  $p < 0.05$ , Data were from 3 independent experiments.

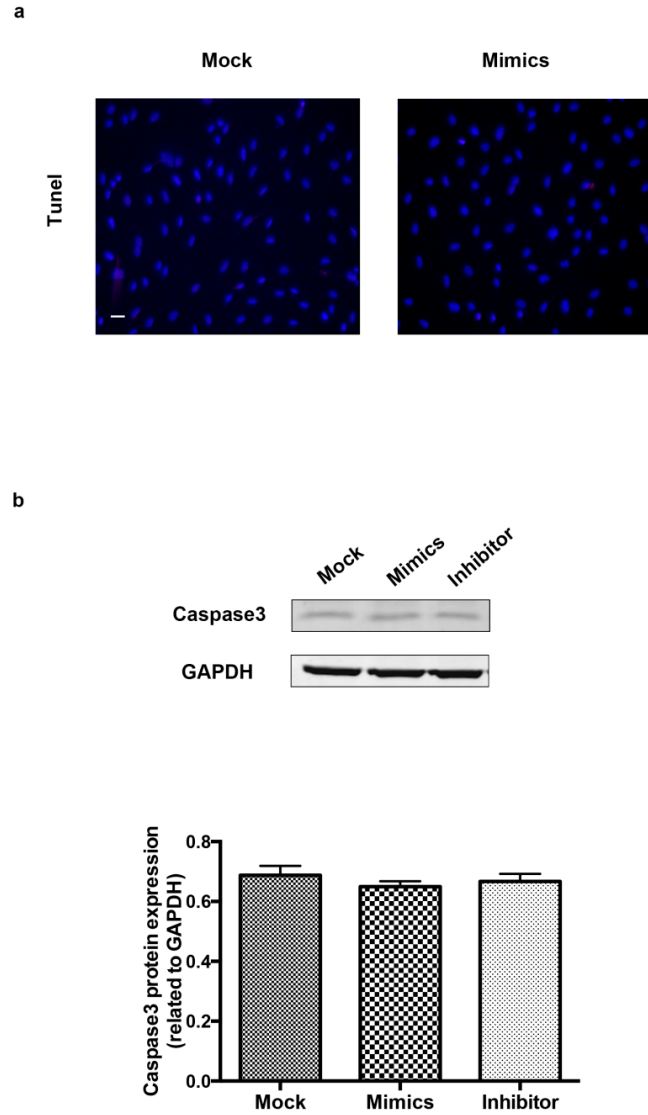

**Figure S3.** miR-134 does not cause hCMPCs apoptosis. **(a)** TUNEL staining assay for cell apoptosis detection; **(b)** Expression of Caspase 3 in hCMPCs transfected with miR-134 mimics or inhibitor. miR-134 mimics or inhibitor did not induce hCMPCs apoptosis. Bar = 75  $\mu$ m. Data were from 3 independent experiments.

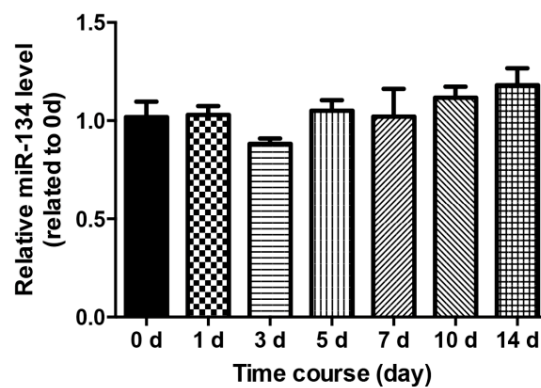

**Figure S4.** The expression level of miR-134 remains unchanged during hCMPCs differentiation. Data were from 3 independent experiments.

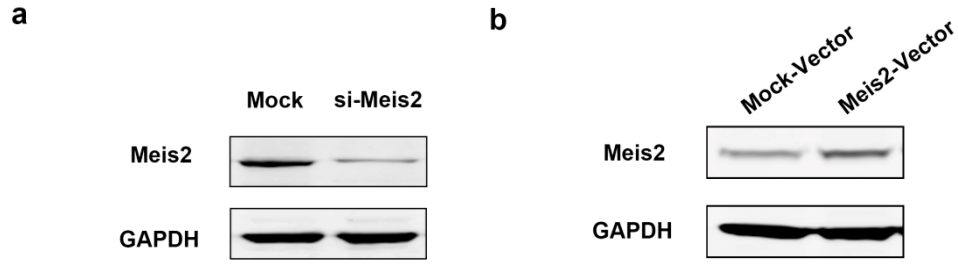

**Figure S5.** Expression of the Meis2 protein is altered under different treatments. The Meis2 protein level was altered in hCMPCs that were treated with si-Meis2 (a) or Meis2 overexpression vector (b).

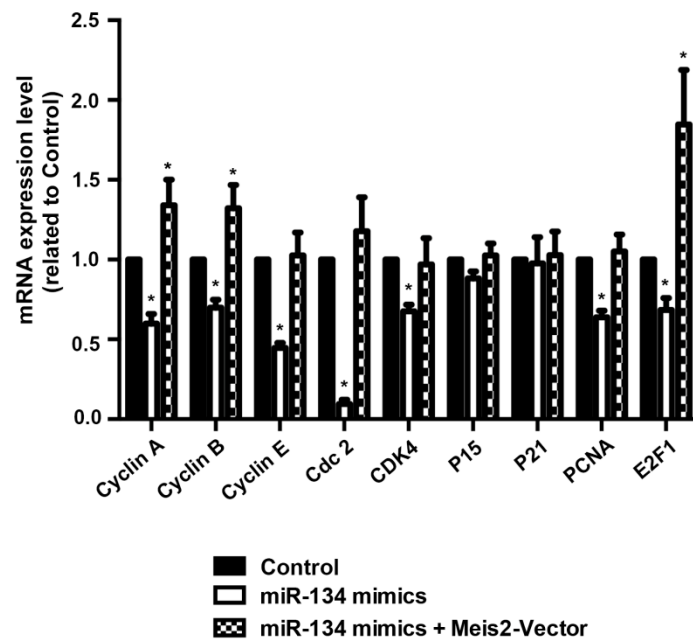

**Figure S6.** Over-expression of Meis2 prevents the effect of miR-134 on cell cycle genes. \*  $p < 0.05$ , Data were from 3 independent experiments.

**Table S1.** Primer sequences for gene expression detection.

| <b>Genes</b>    | <b>Primer Sequences</b>                                            |
|-----------------|--------------------------------------------------------------------|
| <i>Meis2</i>    | 5'-GTGAGCCAAGGAGCAGCATA-3'<br>5'-ACATGTAGTGCCATTGCCCA-3'           |
| <i>Cyclin A</i> | 5'-AACTTCAGCTTGTGGGCACT-3'<br>5'-AAACTCTGCTACTTCTGGGGG-3'          |
| <i>Cyclin B</i> | 5'-TGCAGCACCTGGCTAAGAAT-3'<br>5'-TAGCATGCTTCGATGTGGCA-3'           |
| <i>Cyclin E</i> | 5'-AAAGTTGCACCAGTTTGCGT-3'<br>5'-TCAGGGGACTTAAACGCCAC-3'           |
| <i>Cdc2</i>     | 5'-CTTTCTTTCGCGCTCTAGCC-3'<br>5'-AATCGGGTAGCCCGTAGACT-3'           |
| <i>CDK4</i>     | 5'-GCGTGAGGGTCTCCCTTGAT-3'<br>5'-ACCGACACCAATTTTCAGCCA-3'          |
| <i>P15</i>      | 5'-ACTAGTGGAGAAGGTGCGAC-3'<br>5'-GCCCATCATCATGACCTGGA-3'           |
| <i>P21</i>      | 5'-AGCTGCCGAAGTCAGTTCCTT-3'<br>5'-GTTCTGACATGGCGCCTCCT-3'          |
| <i>PCNA</i>     | 5'-GGCTCTAGCCTGACAAATGC-3'<br>5'-TCTAGCTGGTTTCGGCTTCAG-3'          |
| <i>E2F1</i>     | 5'-GCCATCCAGGAAAAGGTGTGA-3'<br>5'-GTGATGTCATAGATGCGCCG-3'          |
| <i>MEF2C</i>    | 5'-AGATACCCACAACACACCACGCGCC-3'<br>5'-ATCCTTCAGAGAGTCGCATGCGCTT-3' |
| <i>GATA-4</i>   | 5'-GACAATCTGGTTAGGGGAAGC-3'<br>5'-ACCAGCAGCAGCGAGGAGAT-3'          |
| <i>Nkx-2.5</i>  | 5'-CGCCGCTCCAGTTCATAG-3'<br>5'-GGTGGAGCTGGAGAAGACAGA-3'            |
| <i>MHC</i>      | 5'-GAAGCCCAGCACATCAAAAG-3'<br>5'-GATCACCAACAACCCCTACG-3'           |
| <i>Actin</i>    | 5'-TCCTGATGCGCATTTTATTC-3'<br>5'-AACACCACTGCTCTAGCCACG-3'          |
